# Supplementary material for: Population Genetic Analysis Infers Migration Pathways of Phytophthora ramorum in US Nurseries
Source: PubMed Central journal article supplement (PMC2736564; doi:10.1371/journal.ppat.1000583), 2009-09-18
Supplement: ppat.1000583.s002.pdf [file ppat.1000583.s002.pdf]

**Table S2.** Distribution of multilocus genotypes belonging to the NA1 clonal lineage.

| <b>NA1 multilocus genotype</b> | <b>Num. of isolates</b> | <b>States (number isolates per state)</b>                                                                        |
|--------------------------------|-------------------------|------------------------------------------------------------------------------------------------------------------|
| 1                              | 52                      | AL (1), AR (1), CA (20), FL (5), GA (11), LA (1), MD (1), NM (1), OR (1), PA (1), SC (1), TX (3), VA (2), WA (3) |
| 2                              | 22                      | CA (1), CT (3), OR (6), WA (12)                                                                                  |
| 3                              | 14                      | CA (3), NC (2), TX (1), WA (8)                                                                                   |
| 4                              | 12                      | CA (1), OR (2), WA (9)                                                                                           |
| 5                              | 10                      | CT (1), OR (4), WA (5)                                                                                           |
| 6                              | 9                       | FL (1), GA (7), VA (1)                                                                                           |
| 7                              | 8                       | CA (2), GA (2), OR (1), TN (1), TX (1), WA (1)                                                                   |
| 8                              | 8                       | WA                                                                                                               |
| 9 <sup>a</sup>                 | 7                       | CA (6), WA (1)                                                                                                   |
| 10                             | 6                       | AL (1), MS (1), WA (4)                                                                                           |
| 11                             | 6                       | CA (1), CO (1), FL (1), GA (2), TX (1)                                                                           |
| 12                             | 6                       | OR (2), WA (4)                                                                                                   |
| 13                             | 5                       | CT (1), OR (2), WA (2)                                                                                           |
| 14                             | 5                       | WA                                                                                                               |
| 15                             | 4                       | FL (1), GA (1), WA (2)                                                                                           |
| 16                             | 4                       | WA                                                                                                               |
| 17                             | 3                       | GA (1), WA (2)                                                                                                   |
| 18                             | 3                       | OR (2), WA (1)                                                                                                   |
| 19                             | 3                       | WA                                                                                                               |
| 20                             | 3                       | WA                                                                                                               |
| 21                             | 2                       | GA                                                                                                               |
| 22                             | 2                       | GA (1), OR (1)                                                                                                   |
| 23                             | 2                       | OR                                                                                                               |
| 24                             | 2                       | OR (1), WA (1)                                                                                                   |
| 25                             | 2                       | WA                                                                                                               |
| 26 <sup>a</sup>                | 1                       | CA                                                                                                               |
| 27                             | 1                       | CA                                                                                                               |
| 28                             | 1                       | CT                                                                                                               |
| 29                             | 1                       | FL                                                                                                               |
| 30                             | 1                       | FL                                                                                                               |
| 31                             | 1                       | GA                                                                                                               |
| 32                             | 1                       | GA                                                                                                               |
| 33                             | 1                       | OR                                                                                                               |
| 34                             | 1                       | OR                                                                                                               |
| 35                             | 1                       | SC                                                                                                               |
| 36                             | 1                       | TX                                                                                                               |
| 37                             | 1                       | TX                                                                                                               |
| 38                             | 1                       | TX                                                                                                               |
| 39                             | 1                       | VA                                                                                                               |
| 40                             | 1                       | VA                                                                                                               |
| 41                             | 1                       | WA                                                                                                               |

---

|                 |   |    |
|-----------------|---|----|
| 42              | 1 | WA |
| 43              | 1 | WA |
| 44              | 1 | WA |
| 45 <sup>a</sup> | 1 | WA |
| 46              | 1 | WA |
| 47              | 1 | WA |
| 48              | 1 | WA |
| 49              | 1 | WA |
| 50              | 1 | WA |
| 51              | 1 | WA |
| 52              | 1 | WA |
| 53              | 1 | WA |

---

<sup>a</sup> Genotype with null allele at PrMS43b
