# Supplementary material for: Population Genetic Analysis Infers Migration Pathways of Phytophthora ramorum in US Nurseries
Source: PubMed Central journal article supplement (PMC2736564; doi:10.1371/journal.ppat.1000583), 2009-09-18
Supplement: ppat.1000583.s003.pdf [file ppat.1000583.s003.pdf]

**Table S3.** Confirmed *P. ramorum*-positive nursery-related sites (nurseries and residential landscapes, except for CA which is nurseries only) by state and year (<http://www.suddenoakdeath.org>).

| <b>State</b>      | <b>Year</b> | <b><i>Pr</i>+ Sites</b> |
|-------------------|-------------|-------------------------|
| California (CA)   | 2004        | 55                      |
|                   | 2006        | 28                      |
|                   | 2007        | 7                       |
| Colorado (CO)     | 2004        | 1                       |
| Connecticut (CT)  | 2004        | 3                       |
|                   | 2006        | 1                       |
| Florida (FL)      | 2004        | 6                       |
|                   | 2006        | 2                       |
|                   | 2007        | 1                       |
| Georgia (GA)      | 2004        | 16                      |
| Louisiana (LA)    | 2004        | 5                       |
| Maryland (MD)     | 2004        | 3                       |
| Mississippi (MS)  | 2007        | 1                       |
| N. Carolina (NC)  | 2004        | 9                       |
| New Mexico (NM)   | 2004        | 1                       |
| Oregon (OR)       | 2004        | 24                      |
|                   | 2005        | 20                      |
|                   | 2006        | 13                      |
|                   | 2007        | 2                       |
| Pennsylvania (PA) | 2004        | 2                       |
| S. Carolina (SC)  | 2004        | 4                       |
| Tennessee (TN)    | 2004        | 2                       |
| Texas (TX)        | 2004        | 11                      |
| Virginia (VA)     | 2004        | 2                       |
| Washington (WA)   | 2004        | 25                      |
|                   | 2005        | 16                      |
|                   | 2006        | 12                      |
|                   | 2007        | 7                       |
